# Supplementary material for: Persistent Organic Pollutants in Austrian Human Breast Milk Collected between 2013 and 2016
Source: MDPI journal article supplement (doi:10.3390/jox14010015), 2024-02-07
Supplement: s1 [file s1]

**Supplementary information (SI)**

**Persistent Organic Pollutants in Austrian Human Breast Milk  
collected between 2013 and 2016**

**Table S1:** Investigated substances, limits of detection (LOD) and limits of quantification (LOQ).

| Substance                                                | Abbreviation | CAS#        | LOD                       | LOQ                                             | Measured in |     |     |
|----------------------------------------------------------|--------------|-------------|---------------------------|-------------------------------------------------|-------------|-----|-----|
|                                                          |              |             |                           |                                                 | (1)         | (2) | (3) |
| <i>PBDE congeners</i>                                    |              |             | <i>[ng/g milk] (1)</i>    | <i>[ng/g milk] (1)</i><br><i>[ng/g fat] (3)</i> |             |     |     |
| 4,4'-Dibromodiphenyl ether                               | BDE-15       | 2050-47-7   |                           | 0.00017 (3)                                     |             |     | x   |
| 2,2',4-Tribromodiphenyl ether                            | BDE-17       | 147217-75-2 |                           | 0.00092 (3)                                     |             |     | x   |
| 2,4,4'-Tribromodiphenyl ether                            | BDE-28       | 41318-75-6  | 0.0000068-<br>0.00035 (1) | 0.0026-0.0088<br>(1); 0.00093<br>(3)            | x           |     | x   |
| 2,2',4,4'-Tetrabromodiphenyl ether <sup>*,1</sup>        | BDE-47       | 5436-43-1   | 0.000018-<br>0.0005 (1)   | 0.028-0.095<br>(1); 0.00056<br>(3)              | x           |     | x   |
| 2,2',4,5'-Tetrabromodiphenyl ether <sup>*,1</sup>        | BDE-49       | 243982-82-3 | 0.000019-<br>0.00044 (1)  | 0.00014-<br>0.00088 (1);<br>0.00091 (3)         | x           |     | x   |
| 2,3',4,4'-Tetrabromodiphenyl ether <sup>*,1</sup>        | BDE-66       | 189084-61-5 | 0.000028-<br>0.0012 (1)   | 0.00029-<br>0.0024 (1);<br>0.00084 (3)          | x           |     | x   |
| 2,4,4',6-Tetrabromodiphenyl ether                        | BDE-75       | 189084-63-7 |                           | 0.00059 (3)                                     |             |     | x   |
| 3,3',4,4'-Tetrabromodiphenyl ether <sup>*,1</sup>        | BDE-77       | 93703-48-1  | 0.000014-<br>0.0005 (1)   | 0.00011-0.001<br>(1); 0.00048<br>(3)            | x           |     | x   |
| 2,2',3,4,4'-Pentabromodiphenyl ether <sup>*,1</sup>      | BDE-85       | 182346-21-0 | 0.00016-<br>0.0061 (1)    | 0.0033-0.012<br>(1)                             | x           |     |     |
| 2,2',4,4',5-Pentabromodiphenyl ether <sup>*,1</sup>      | BDE-99       | 60348-60-9  | 0.000028-<br>0.00097 (1)  | 0.012-0.042<br>(1); 0.00170<br>(3)              | x           |     | x   |
| 2,2',4,4',6-Pentabromodiphenyl ether <sup>*,1</sup>      | BDE-100      | 189084-64-8 | 0.000022-<br>0.001 (1)    | 0.0034-0.011<br>(1); 0.00195<br>(3)             | x           |     | x   |
| 2,3',4,4',5-Pentabromodiphenyl ether <sup>*,1</sup>      | BDE-118      | 446254-80-4 | 0.000049-<br>0.0014 (1)   | 0.00075-<br>0.0028 (1)                          | x           |     |     |
| 2,3',4,4',6-Pentabromodiphenyl ether                     | BDE-119      | 189084-66-0 |                           | 0.00145 (3)                                     |             |     | x   |
| 3,3',4,4',5-Pentabromodiphenyl ether <sup>*,1</sup>      | BDE-126      | 366791-32-4 | 0.00011-<br>0.0041 (1)    | 0.0022-0.0082<br>(1)                            | x           |     |     |
| 2,2',3,4,4',5',6-Heptabromodiphenyl ether                | BDE-138      | 207122-16-5 |                           | 0.00089 (3)                                     |             |     | x   |
| 2,2',3,4,4',6-Hexabromodiphenyl ether <sup>*,1</sup>     | BDE-139      | 446254-96-2 | 0.000066-<br>0.0018 (1)   | 0.00058-<br>0.0036 (1)                          | x           |     |     |
| 2,2',4,4',5,5'-Hexabromodiphenyl ether <sup>*,1</sup>    | BDE-153      | 68631-49-2  | 0.000044-<br>0.0012 (1)   | 0.00042-<br>0.0024 (1);<br>0.00062 (3)          | x           |     | x   |
| 2,2',4,4',5,6'-Hexabromodiphenyl ether <sup>*,1</sup>    | BDE-154      | 207122-15-4 | 0.000028-<br>0.0016 (1)   | 0.00032-<br>0.0032 (1);<br>0.00060 (3)          | x           |     | x   |
| 2,2',3,4,4',5,6-Heptabromodiphenyl ether <sup>*,1</sup>  | BDE-181      | 189084-67-1 | 0.000061-<br>0.00053 (1)  | 0.00012-<br>0.0011 (1)                          | x           |     |     |
| 2,2',3,4,4',5',6-Heptabromodiphenyl ether <sup>*,1</sup> | BDE-183      | 207122-16-5 | 0.000052-<br>0.00046 (1)  | 0.0038-0.013<br>(1); 0.00249<br>(3)             | x           |     | x   |
| 2,3,3',4,4',5,6-Heptabromodiphenyl ether                 | BDE-190      | 189084-68-2 |                           | 0.00479                                         |             |     | x   |
| 2,2',3,3',4,4',5,6'-Octabromodiphenyl ether              | BDE-196      | 446255-39-6 | 0.000085-<br>0.0012 (1)   | 0.0054-0.018<br>(1)                             | x           |     |     |
| 2,2',3,3',4,4',6,6'-Octabromodiphenyl ether              | BDE-197      | 117964-21-3 | 0.000094-<br>0.0013 (1)   | 0.0042-0.014<br>(1)                             | x           |     |     |
| 2,2',3,4,4',5,5',6-Octabromodiphenyl ether               | BDE-203      | 337513-72-1 | 0.001-0.002<br>(1)        | 0.006-0.02 (1);<br>0.00187 (3)                  | x           |     | x   |

| Substance                                                       | Abbreviation         | CAS#         | LOD                                           | LOQ                       | Measured in |     |     |
|-----------------------------------------------------------------|----------------------|--------------|-----------------------------------------------|---------------------------|-------------|-----|-----|
|                                                                 |                      |              |                                               |                           | (1)         | (2) | (3) |
| 2,2',3,3',4,4',5,5',6-Nonabromodiphenyl ether                   | BDE-206              | 63387-28-0   |                                               | 0.0126 (3)                |             |     | x   |
| 2,2',3,3',4,4',5,6,6'-Nonabromodiphenyl ether                   | BDE-207              | 437701-79-6  | 0.00027-0.004 (1)                             | 0.059-0.2 (1); 0.0072 (3) | x           |     | x   |
| 2,2',3,3',4,4',5,5',6,6'-decabromodiphenyl ether <sup>*,1</sup> | BDE-209              | 1163-19-5    | 0.0019-0.021 (1)                              | 0.87-4.0 (1)              | x           |     |     |
| <b>PFAS</b>                                                     |                      |              | <b>[ng/l]</b>                                 | <b>[ng/l]</b>             |             |     |     |
| perfluoro-1-butanesulfonate                                     | PFBS                 | 375-73-5     | 7.7 (1); 1.6 (2)                              | 28 (1); 7.7 (2)           | x           | x   |     |
| perfluoro-n-butanoic acid                                       | PFBA                 | 375-22-4     | 1.4                                           | 7.1-7.2                   |             | x   |     |
| perfluoro-n-pentanoic acid                                      | PFPeA                | 2706-90-3    | 1.1 (2); 0.01 <sup>11</sup> (3)               | 5.7 (2)                   |             | x   | x   |
| perfluoro-n-pentane sulfonate                                   | PFPeS                | 630402-22-1  | 1.7                                           | 7.9                       |             | x   |     |
| perfluoro-n-hexanoic acid                                       | PFHxA                | 307-24-4     | 2.3 (1); 1.4 (2); 0.01 <sup>11</sup> (3)      | 8.4 (1); 7.1 (2)          | x           | x   | x   |
| perfluoro-1-hexanesulfonate <sup>4</sup>                        | PFHxS                | 355-46-4     | 6.2 (1); 9.0 (2); 0.01 <sup>11</sup> (3)      | 23 (1); 4.1 (2)           | x           | x   | x   |
| perfluoro-n-heptanoic acid                                      | PFHpA                | 375-85-9     | 2.7 (1); 1.4 (2); 0.01 <sup>11</sup> (3)      | 10 (1); 6.1 (2)           | x           | x   | x   |
| perfluoro-heptanesulfonate                                      | PFHpS                | 375-92-8     | 13 (1); 1.9 (2)                               | 47 (1); 9.0 (2)           | x           | x   |     |
| perfluorooctanoic acid <sup>*,1</sup>                           | PFOA                 | 335-67-1     | 6.2 (1); 1.4-2.8 (2); 0.015 <sup>11</sup> (3) | 22 (1); 6.1-12 (2)        | x           | x   | x   |
| perfluorooctanesulphonate <sup>*,2</sup>                        | PFOS                 | 1763-23-1    | 13 (1); 2.4-8.4 (2); 0.01 <sup>11</sup> (3)   | 47 (1); 11-38             | x           | x   | x   |
| perfluoro-n-nonanoic acid                                       | PFNA                 | 375-95-1     | 3.9 (1); 1.1-3.6 (2); 0.01 <sup>11</sup> (3)  | 15 (1); 4.6-16 (2)        | x           | x   | x   |
| perfluoro-n-nonane sulfonate                                    | PFNS                 | 98789-57-2   | 1.5                                           | 6.9                       |             | x   |     |
| perfluoro-n-decanoic acid                                       | PFDA                 | 335-76-2     | 2.4 (1); 1.1-6.6 (2); 0.01 <sup>11</sup> (3)  | 9.0 (1); 4.3-26 (2)       | x           | x   | x   |
| perfluoro decanesulfonate                                       | PFDS                 | 67906-42-7   | 10 (1); 1.4 (2)                               | 36 (1); 6.6 (2)           | x           | x   |     |
| perfluoro-n-undecanoic acid                                     | PFUnDA               | 2058-94-8    | 7.2 (1); 1.3-2.9 (2); 0.01 <sup>11</sup> (3)  | 27 (1); 6.3-15 (2)        | x           | x   | x   |
| perfluoro-n-dodecanoic acid                                     | PFDoA                | 307-55-1     | 3.4 (1); 1.3-2.6 (2)                          | 26 (1); 6.5-13 (2)        | x           | x   |     |
| perfluoro-n-tridecanoic acid                                    | PFTTrDA              | 72629-94-8   | 10 (1); 2.4 (2)                               | 37 (1); 12 (2)            | x           | x   |     |
| perfluoro-n-tetradecanoic acid                                  | PFTeDA               | 376-06-7     | 13 (1); 2.0-4.9 (2)                           | 47 (1); 9.5-23 (2)        | x           | x   |     |
| N-ethyl-perfluoro-n-octane sulfonamido acetic acid              | EtFOSAA              | 2991-50-6    | 1.2-4.0                                       | 6.1-20                    |             | x   |     |
| 4:2 fluorotelomer sulfonate                                     | 4:2 FTSA             | 757124-72-4  | 1.3                                           | 6.0                       |             | x   |     |
| 6:2 fluorotelomer sulfonate                                     | 6:2 FTSA             | 27619-97-2   | 2.4                                           | 11                        |             | x   |     |
| 8:2 fluorotelomer sulfonate                                     | 8:2 FTSA             | 39108-34-4   | 8.1                                           | 37                        |             | x   |     |
| dodecafluoro-3H-4,8-dioxanonoate                                | DONA                 | 919005-14-4  | 1.2                                           | 5.8                       |             | x   |     |
| 6:2 chlorinated polyfluorinated ether sulfonate                 | 6:2 Cl-PFESA (F-53B) | 73606-19-6   | 1.1                                           | 5.1                       |             | x   |     |
| hexafluoropropylene oxide-dimer acid                            | HFPO-DA (GenX)       | 13252-13-6   | 6.0                                           | 28-30                     |             | x   |     |
| <b>Persistent organic pollutants (POPs)</b>                     |                      |              | <b>[ng/g] lipid</b>                           | <b>[ng/g] lipid</b>       |             |     |     |
| Aldrin <sup>*,1</sup>                                           |                      | 309-00-2     | 0.5                                           |                           |             |     | x   |
| Chlordane <sup>*,1,5</sup>                                      |                      | see footnote | 0.5                                           |                           |             |     | x   |
| Dieldrin <sup>*,1</sup>                                         |                      | 60-57-1      | 0.5                                           |                           |             |     | x   |
| DDT <sup>*,2,6</sup>                                            |                      | see footnote | 0.5                                           |                           |             |     | x   |

| Substance                                                | Abbreviation        | CAS#         | LOD | LOQ           | Measured in |     |     |
|----------------------------------------------------------|---------------------|--------------|-----|---------------|-------------|-----|-----|
|                                                          |                     |              |     |               | (1)         | (2) | (3) |
| Endrin <sup>*,1,7</sup>                                  |                     | see footnote | 0.5 |               |             |     | x   |
| Heptachlor <sup>*,1,8</sup>                              |                     | see footnote | 0.5 |               |             |     | x   |
| Hexachlorobenzene <sup>*,1,3</sup>                       | HCB                 | 118-74-1     | 0.5 |               |             |     | x   |
| alpha-Hexachlorocyclohexane <sup>*,1</sup>               | α-HCH               | 319-84-6     | 0.5 |               |             |     | x   |
| beta-Hexachlorocyclohexane <sup>*,1</sup>                | β-HCH               | 319-85-7     | 0.5 |               |             |     | x   |
| gamma-Hexachlorocyclohexane <sup>*,1</sup>               | γ-HCH               | 58-89-9      | 0.5 |               |             |     | x   |
| Endosulfan <sup>*,1,9</sup>                              |                     | see footnote | 0.5 |               |             |     | x   |
| Toxaphene (Parlar) <sup>*,1,10</sup>                     |                     | see footnote | 0.5 |               |             |     | x   |
| Mirex <sup>*,1</sup>                                     |                     | 2385-85-5    | 0.5 |               |             |     | x   |
| Hexabromobiphenyl <sup>*,1</sup>                         |                     | 36255-01-8   | 0.5 |               |             |     | x   |
| Pentachlorobenzene <sup>*,1,3</sup>                      |                     | 608-93-5     | 0.5 |               |             |     | x   |
| Chlordecone <sup>*,1</sup>                               |                     | 143-50-0     | 0.5 |               |             |     | x   |
| alpha-hexabromocyclododecane <sup>*,1</sup>              | α-HBCD              | 134237-50-6  | 0.1 |               |             |     | x   |
| beta- hexabromocyclododecane <sup>*,1</sup>              | β-HBCD              | 134237-51-7  | 0.1 |               |             |     | x   |
| gamma-hexabromocyclododecane <sup>*,1</sup>              | γ-HBCD              | 134237-52-8  | 0.1 |               |             |     | x   |
| <b>Persistent organic pollutants (POPs)</b>              |                     |              |     | <b>[pg/g]</b> |             |     |     |
| 2,3,7,8-Tetrachlorodibenzofuran <sup>*,3</sup>           | 2,3,7,8-TCDF        | 51207-31-9   |     | 0.006         |             |     | x   |
| 1,2,3,7,8-Pentachlorodibenzofuran <sup>*,3</sup>         | 1,2,3,7,8-PeCDF     | 57117-41-6   |     | 0.009         |             |     | x   |
| 2,3,4,7,8-Pentachlorodibenzofuran <sup>*,3</sup>         | 2,3,4,7,8-PeCDF     | 57117-31-4   |     | 0.01          |             |     | x   |
| 1,2,3,4,7,8-Hexachlorodibenzofuran <sup>*,3</sup>        | 1,2,3,4,7,8-HxCDF   | 70648-26-9   |     | 0.02          |             |     | x   |
| 1,2,3,6,7,8-Hexachlorodibenzofuran <sup>*,3</sup>        | 1,2,3,6,7,8-HxCDF   | 57117-44-9   |     | 0.02          |             |     | x   |
| 2,3,4,6,7,8-Hexachlorodibenzofuran <sup>*,3</sup>        | 2,3,4,6,7,8-HxCDF   | 60851-34-5   |     | 0.02          |             |     | x   |
| 1,2,3,7,8,9-Hexachlorodibenzofuran <sup>*,3</sup>        | 1,2,3,7,8,9-HxCDF   | 72918-21-9   |     | 0.03          |             |     | x   |
| 1,2,3,4,6,7,8-Heptachlorodibenzofuran <sup>*,3</sup>     | 1,2,3,4,6,7,8-HpCDF | 67562-39-4   |     | 0.007         |             |     | x   |
| 1,2,3,4,7,8,9-Heptachlorodibenzofuran <sup>*,3</sup>     | 1,2,3,4,7,8,9-HpCDF | 55673-89-7   |     | 0.009         |             |     | x   |
| Octachlorodibenzofuran <sup>*,3</sup>                    | OCDF                | 39001-02-0   |     | 0.003         |             |     | x   |
| 2,3,7,8-Tetrachlorodibenzo-p-dioxin <sup>*,3</sup>       | 2,3,7,8-TCDD        | 1746-01-6    |     | 0.005         |             |     | x   |
| 1,2,3,7,8-Pentachlorodibenzo-p-dioxin <sup>*,3</sup>     | 1,2,3,7,8-PeCDD     | 40321-76-4   |     | 0.03          |             |     | x   |
| 1,2,3,4,7,8-Hexachlorodibenzo-p-dioxin <sup>*,3</sup>    | 1,2,3,4,7,8-HxCDD   | 39227-28-6   |     | 0.03          |             |     | x   |
| 1,2,3,6,7,8-Hexachlorodibenzo-p-dioxin <sup>*,3</sup>    | 1,2,3,6,7,8-HxCDD   | 57653-85-7   |     | 0.03          |             |     | x   |
| 1,2,3,7,8,9-Hexachlorodibenzo-p-dioxin <sup>*,3</sup>    | 1,2,3,7,8,9-HxCDD   | 19408-74-3   |     | 0.03          |             |     | x   |
| 1,2,3,4,6,7,8-Heptachlorodibenzo-p-dioxin <sup>*,3</sup> | 1,2,3,4,6,7,8-HpCDD | 35822-46-9   |     | 0.007         |             |     | x   |
| Octachlorodibenzo-p-dioxin <sup>*,3</sup>                | OCDD                | 3268-87-9    |     | 0.02          |             |     | x   |
| <b>Persistent organic pollutants (POPs)</b>              |                     |              |     | <b>[ng/g]</b> |             |     |     |
| 2,4,4'-Trichlorobiphenyl <sup>*,1</sup>                  | PCB 28              | 7012-37-5    |     | 0.002         |             |     | x   |
| 2,2',5,5'-Tetrachlorobiphenyl <sup>*,1</sup>             | PCB 52              | 35693-99-3   |     | 0.006         |             |     | x   |
| 3,3',4,4'-Tetrachlorobiphenyl <sup>*,1</sup>             | PCB 77              | 32598-13-3   |     | 0.0000001     |             |     | x   |
| 3,4,4',5-Tetrachlorobiphenyl <sup>*,1</sup>              | PCB 81              | 70362-50-4   |     | 0.0000001     |             |     | x   |
| 2,2',4,5,5'-Pentachlorobiphenyl <sup>*,1</sup>           | PCB 101             | 37680-73-2   |     | 0.01          |             |     | x   |

| Substance                                           | Abbreviation | CAS#       | LOD | LOQ        | Measured in |     |     |
|-----------------------------------------------------|--------------|------------|-----|------------|-------------|-----|-----|
|                                                     |              |            |     |            | (1)         | (2) | (3) |
| 2,3,3',4,4'-Pentachlorobiphenyl <sup>*,1</sup>      | PCB 105      | 32598-14-4 |     | 0.00002    |             |     | x   |
| 2,3,4,4',5-Pentachlorobiphenyl <sup>*,1</sup>       | PCB 114      | 74472-37-0 |     | 0.00001    |             |     | x   |
| 2,3',4,4',5-Pentachlorobiphenyl <sup>*,1</sup>      | PCB 118      | 31508-00-6 |     | 0.00001    |             |     | x   |
| 2,3',4,4',5'-Pentachlorobiphenyl <sup>*,1</sup>     | PCB 123      | 65510-44-3 |     | 0.00001    |             |     | x   |
| 3,3',4,4',5-Pentachlorobiphenyl <sup>*,1</sup>      | PCB 126      | 57465-28-8 |     | 0.0000003  |             |     | x   |
| 2,2',3,4,4',5'-Hexachlorobiphenyl <sup>*,1</sup>    | PCB 138      | 35065-28-2 |     | 0.02       |             |     | x   |
| 2,2',4,4',5,5'-Hexachlorobiphenyl <sup>*,1</sup>    | PCB 153      | 35065-27-1 |     | 0.02       |             |     | x   |
| 2,3,3',4,4',5-Hexachlorobiphenyl <sup>*,1</sup>     | PCB 156      | 38380-08-4 |     | 0.00002    |             |     | x   |
| 2,3,3',4,4',5'-Hexachlorobiphenyl <sup>*,1</sup>    | PCB 157      | 69782-90-7 |     | 0.00002    |             |     | x   |
| 2,3',4,4',5,5'-Hexachlorobiphenyl <sup>*,1</sup>    | PCB 167      | 52663-72-6 |     | 0.00002    |             |     | x   |
| 3,3',4,4',5,5'-Hexachlorobiphenyl <sup>*,1</sup>    | PCB 169      | 1336-36-3  |     | 0.00000003 |             |     | x   |
| 2,2',3,4,4',5,5'-Heptachlorobiphenyl <sup>*,1</sup> | PCB 180      | 35065-29-3 |     | 0.03       |             |     | x   |
| 2,3,3',4,4',5,5'-Heptachlorobiphenyl <sup>*,1</sup> | PCB 189      | 39635-31-9 |     | 0.00002    |             |     | x   |
| Short-chained chlorinated paraffins <sup>*,1</sup>  | SCCPs        | -          | 2.2 | 6.2        |             |     | x   |
| Medium-chained chlorinated paraffins                | MCCPs        | -          | 3.0 | 8.8        |             |     | x   |
| Pentachlorophenol <sup>*,1</sup>                    | PCP          | 87-86-5    | 0.5 |            |             |     | x   |
| Pentachloroanisole                                  |              | 1825-21-4  | 0.5 |            |             |     | x   |
| Hexachlorobutadiene <sup>*,1,3</sup>                | HCBD         | 87-68-3    | 1.0 |            |             |     | x   |

(1) pilot study (2013); (2) follow-up study (2014-2016); (3) WHO/UNEP breast milk monitoring programme

\* listed in Stockholm Convention

<sup>1</sup> listed in Annex A of the Stockholm Convention (Elimination)

<sup>2</sup> listed in Annex B of the Stockholm Convention (Restriction)

<sup>3</sup> listed in Annex C of the Stockholm Convention (Unintentional production)

<sup>4</sup> recommended for listing in the Stockholm Convention

<sup>5</sup> sum of alpha-chlordane (CAS# 5103-71-9), gamma-chlordane (CAS# 5566-34-7) and oxy-chlordane (CAS# 27304-13-8); calculated as chlordane

<sup>6</sup> sum of o,p'-DDT (CAS# 789-02-6), p,p'-DDT (CAS# 50-29-3), p,p'-DDE (CAS# 68679-99-2) and p,p'-DDD (CAS# 72-45-8); calculated as DDT

<sup>7</sup> sum of endrin (CAS# 72-20-8) and endrin ketone (CAS# 53494-70-5); calculated as endrin

<sup>8</sup> sum of heptachlor (CAS# 76-44-8) and heptachlor epoxide (cis/trans) (CAS# 1024-57-3); calculated as heptachlor

<sup>9</sup> sum of alpha-endosulfan (CAS# 959-98-8), beta-endosulfan (CAS# 33213-65-9) and endosulfan sulfate (CAS# 1031-07-8)

<sup>10</sup> sum of parlar 26 (CAS# 142534-71-2), parlar 50 (CAS# 66860-80-8) and parlar 62 (CAS# 154159-06-5)

<sup>11</sup> given in ng/g milk; comprising the method detection limit (MDL)

**Table S2:** Correlations (Spearman) between levels of PBDE congeners in breast milk (n=18) of the pilot study (2013).

|                | triBDE<br>BDE-28 | tetraBDEs<br>BDE-47 BDE-49 BDE-66 BDE-77 |         |         |         | pentaBDEs<br>BDE-99 BDE-100 BDE-118 BDE-126 |        |         |        | hexaBDEs<br>BDE-139 BDE-153 BDE-154 |         |        | heptaBDE<br>BDE-183 | octaBDEs<br>BDE-196 BDE-197 BDE-203 |         |         | nonaBDE<br>BDE-207 |
|----------------|------------------|------------------------------------------|---------|---------|---------|---------------------------------------------|--------|---------|--------|-------------------------------------|---------|--------|---------------------|-------------------------------------|---------|---------|--------------------|
| <b>BDE-47</b>  | 0.705**          |                                          |         |         |         |                                             |        |         |        |                                     |         |        |                     |                                     |         |         |                    |
| <b>BDE-49</b>  | 0.656**          | 0.421                                    |         |         |         |                                             |        |         |        |                                     |         |        |                     |                                     |         |         |                    |
| <b>BDE-66</b>  | 0.654**          | 0.428                                    | 0.997** |         |         |                                             |        |         |        |                                     |         |        |                     |                                     |         |         |                    |
| <b>BDE-77</b>  | 0.684**          | 0.443                                    | 0.955** | 0.952** |         |                                             |        |         |        |                                     |         |        |                     |                                     |         |         |                    |
| <b>BDE-99</b>  | 0.767**          | 0.934**                                  | 0.501*  | 0.504*  | 0.515*  |                                             |        |         |        |                                     |         |        |                     |                                     |         |         |                    |
| <b>BDE-100</b> | 0.882**          | 0.866**                                  | 0.539*  | 0.544*  | 0.573*  | 0.920**                                     |        |         |        |                                     |         |        |                     |                                     |         |         |                    |
| <b>BDE-118</b> | 0.681*           | 0.450                                    | 0.952** | 0.955** | 0.997** | 0.518*                                      | 0.578* |         |        |                                     |         |        |                     |                                     |         |         |                    |
| <b>BDE-126</b> | 0.213            | -0.024                                   | 0.346   | 0.292   | 0.362   | 0.072                                       | 0.070  | 0.306   |        |                                     |         |        |                     |                                     |         |         |                    |
| <b>BDE-139</b> | 0.644**          | 0.442                                    | 0.828** | 0.828** | 0.867** | 0.488*                                      | 0.545* | 0.867** | 0.385  |                                     |         |        |                     |                                     |         |         |                    |
| <b>BDE-153</b> | 0.609**          | 0.243                                    | 0.538*  | 0.528*  | 0.431   | 0.304                                       | 0.507* | 0.421   | 0.047  | 0.370                               |         |        |                     |                                     |         |         |                    |
| <b>BDE-154</b> | 0.688**          | 0.449                                    | 0.944** | 0.940** | 0.989** | 0.519*                                      | 0.570* | 0.985** | 0.306  | 0.800**                             | 0.450   |        |                     |                                     |         |         |                    |
| <b>BDE-183</b> | 0.108            | 0.096                                    | 0.029   | 0.034   | -0.037  | 0.033                                       | 0.153  | -0.032  | -0.352 | 0.038                               | 0.507*  | -0.005 |                     |                                     |         |         |                    |
| <b>BDE-196</b> | 0.069            | -0.013                                   | -0.343  | -0.343  | -0.420  | -0.004                                      | 0.112  | -0.420  | -0.148 | -0.323                              | 0.411   | -0.420 | 0.487*              |                                     |         |         |                    |
| <b>BDE-197</b> | 0.262            | 0.230                                    | 0.029   | 0.046   | -0.086  | 0.134                                       | 0.305  | -0.069  | -0.398 | 0.058                               | 0.601** | -0.092 | 0.570*              | 0.555*                              |         |         |                    |
| <b>BDE-203</b> | 0.189            | 0.294                                    | -0.322  | -0.322  | -0.278  | 0.322                                       | 0.369  | -0.278  | -0.148 | -0.323                              | 0.115   | -0.268 | -0.039              | 0.564*                              | 0.372   |         |                    |
| <b>BDE-207</b> | 0.166            | 0.290                                    | -0.358  | -0.358  | -0.382  | 0.225                                       | 0.216  | -0.382  | -0.225 | -0.221                              | 0.138   | -0.382 | 0.122               | 0.520*                              | 0.558*  | 0.669** |                    |
| <b>BDE-209</b> | 0.138            | 0.219                                    | -0.369  | -0.369  | -0.458  | 0.153                                       | 0.198  | -0.458  | -0.245 | -0.285                              | 0.286   | -0.458 | 0.272               | 0.674**                             | 0.682** | 0.599** | 0.921**            |

\* Correlation is significant at the 0.05 level (2-tailed). \*\* Correlation is significant at the 0.01 level (2-tailed).

**Table S3:** Results on PBDE congeners and total PBDEs concentration (ranges, means, medians in ng/g lipid; detection rates in %) from selected studies in European populations.

| Country                                  | Sampling period | n              | BDE-28                          | BDE-47                            | BDE-66                     | BDE-85              | BDE-99                            | BDE-100                           | BDE-153                           | BDE-154                          | BDE-209                           | Total PBDEs                               | Reference |
|------------------------------------------|-----------------|----------------|---------------------------------|-----------------------------------|----------------------------|---------------------|-----------------------------------|-----------------------------------|-----------------------------------|----------------------------------|-----------------------------------|-------------------------------------------|-----------|
| range (mean; median) [ng/g lipid]        |                 |                |                                 |                                   |                            |                     |                                   |                                   |                                   |                                  |                                   |                                           |           |
| detection rate                           |                 |                |                                 |                                   |                            |                     |                                   |                                   |                                   |                                  |                                   |                                           |           |
| Sweden (Uppsala)                         | 1996-2006       | 276            |                                 | <0.40-16<br>(1.9; 1.5)            |                            |                     | <0.12-5.2<br>(0.45; 0.32)         | <0.10-5.1<br>(0.36; 0.29)         | 0.20-4.6<br>(0.64; 0.57)          |                                  |                                   | 0.91-28<br>(3.5; 2.9) <sup>1</sup>        | [1]       |
| Finland (Turku),<br>Denmark (Copenhagen) | 1997-2001       | 68             | (-; 0.1)                        | (-; 1.12)                         | (-; 0.03)                  |                     | (-; 0.42)                         | (-; 0.27)                         | (-; 0.81)                         | (-; 0.04)                        |                                   | (-; 104.2) <sup>2</sup>                   | [2]       |
| Italy (Rome)                             | 2000-2001       | 1 <sup>3</sup> | 0.082                           | 1.9                               | 0.019                      | 0.074               | 0.97                              | 0.48                              | 0.47                              | 0.07                             |                                   | 4.1 <sup>4</sup>                          | [3]       |
| Norway (Tromsø)                          | 2000-2002       | 10             | n.d.-0.4<br>(0.12; 0.10)<br>90% | 0.42-6.12<br>(1.74; 1.26)<br>100% |                            |                     | 0.16-1.42<br>(0.49; 0.41)<br>100% | 0.15-0.79<br>(0.38; 0.40)<br>100% | 0.43-1.85<br>(0.77; 0.68)<br>100% | n.d.-0.25<br>(0.07; 0.06)<br>60% | 0.05-0.72<br>(0.22; 0.13)<br>100% | 1.68-9.67<br>(3.80;<br>3.19) <sup>5</sup> | [4]       |
| Czech Republic (Olomouc region)          | 2003            | 103            | <0.02-0.07<br>(0.06; 0.07)      | 0.16-2.02<br>(0.65; 0.58)         | <0.02-0.11<br>(0.08; 0.08) |                     | <0.02-0.70<br>(0.24; 0.22)        | <0.02-0.35<br>(0.13; 0.12)        | <0.03-0.54<br>(0.17; 0.15)        | <0.02-0.12<br>(0.08; 0.07)       |                                   |                                           | [5]       |
| Spain (Madrid, Vallecas District)        | 2003-2004       | 22             | <0.01-0.1 (-; 0.01)             | 0.03-3.6 (-; 0.37)                | <0.01                      | <0.01-3.1 (-; 0.17) | 0.30-3.3 (-; 0.51)                | 0.18-1.9 (-; 0.58)                | <0.03-3.2 (-; 0.13)               | <0.005-2.0 (-; 0.02)             | <0.16-52 (-; 2.9)                 |                                           | [6]       |

| Country                           | Sampling period | n                     | BDE-28                    | BDE-47                   | BDE-66     | BDE-85                     | BDE-99                     | BDE-100                     | BDE-153                     | BDE-154                   | BDE-209                   | Total PBDEs                      | Reference |
|-----------------------------------|-----------------|-----------------------|---------------------------|--------------------------|------------|----------------------------|----------------------------|-----------------------------|-----------------------------|---------------------------|---------------------------|----------------------------------|-----------|
| range (mean; median) [ng/g lipid] |                 |                       |                           |                          |            |                            |                            |                             |                             |                           |                           |                                  |           |
| detection rate                    |                 |                       |                           |                          |            |                            |                            |                             |                             |                           |                           |                                  |           |
| Spain (Madrid, Getafe District)   | 2003-2004       | 30                    | <0.01                     | <0.003-1.2 (-; 0.22)     | <0.01      | <0.01-0.43 (-; 0.12)       | 0.15-0.72 (-; 0.38)        | 0.15-1.0 (-; 0.46)          | <0.02-1.2 (-; 0.1)          | <0.01                     | <0.16-33 (-; 2.8)         |                                  | [6]       |
| Norway                            | 2003+           | 393 (46) <sup>6</sup> | <LOQ-6.8 (0.18; 0.093)    | 0.15-56 (1.7; 0.99) 100% |            | <LOQ-0.89 (0.077; 0.040)   | 0.02-9.5 (0.49; 0.27) 100% | <LOQ-6.4 (0.40; 0.25) 99.7% | <LOQ-5.0 (0.56; 0.45) 99.5% | <LOQ-1.2 (0.062; 0.036)   | <LOQ-5.8 (0.61; 0.32) 76% | 0.48-82 (3.4; 2.1) <sup>7</sup>  | [7]       |
|                                   |                 |                       | 95.4%                     |                          |            | 40.7%                      |                            |                             |                             | 63.4%                     |                           |                                  |           |
| Spain (Madrid)                    | 2004            | 11                    |                           |                          |            |                            |                            |                             |                             |                           |                           | 0.04-1.38 (0.33; -) <sup>8</sup> | [8]       |
| Poland (Wielkopolska)             | 2004            | 22                    | <LOQ-0.33 (0.07; <LOQ)    | 0.31-5.62 (1.07; 1.03)   |            |                            | <LOQ-1.43 (0.47; 0.33)     | <LOQ-0.55 (0.15; 0.05)      | 0.015-1.12 (0.53; 0.45)     |                           |                           | 0.08-8.4 (2.5; 2.0) <sup>9</sup> | [9]       |
| France (Toulouse)                 | 2004-2006       | 62-77                 | 0.037-1.62 (0.179; 0.089) | 0.343-12.0 (0.162; 1.15) |            | 0.009-0.216 (0.046; 0.028) | 0.133-5.3 (1.10; 0.527)    | 0.046-3.91 (0.412; 0.226)   | 0.288-10.5 (0.019; 0.781)   | 0.009-0.691 (0.097; 0.04) | 0.39-6.80 (1.88; 1.62)    |                                  | [10]      |
| Spain (Madrid)                    | 2005            | 9                     | <LOQ-0.097                | 0.15-0.97 (0.53; 0.54)   | <LOQ-0.017 | <LOQ-0.26 (0.14; 0.15)     | 0.32-0.69 (0.52; 0.51)     | 0.19-0.81 (0.55; 0.58)      | 0.040-0.63 (0.24; 0.16)     | <LOQ-0.26 (0.061; 0.017)  | 0.20-5.7 (2.5; 2.7)       | 2.1-11 (5.5; 5.3) <sup>10</sup>  | [11]      |



| Country                           | Sampling period | n  | BDE-28              | BDE-47              | BDE-66               | BDE-85               | BDE-99             | BDE-100             | BDE-153             | BDE-154             | BDE-209              | Total PBDEs                        | Reference |
|-----------------------------------|-----------------|----|---------------------|---------------------|----------------------|----------------------|--------------------|---------------------|---------------------|---------------------|----------------------|------------------------------------|-----------|
| range (mean; median) [ng/g lipid] |                 |    |                     |                     |                      |                      |                    |                     |                     |                     |                      |                                    |           |
| detection rate                    |                 |    |                     |                     |                      |                      |                    |                     |                     |                     |                      |                                    |           |
| Germany (Munich)                  | 2005            | 42 | (0.032; 0.01)       |                     | (<LOQ; <LOQ)         |                      |                    |                     |                     |                     |                      |                                    |           |
|                                   |                 |    | 0.19-2.24           |                     |                      |                      | 0.03-1.34          | 0.03-0.70           | 0.19-2.02           |                     |                      | 0.65-5.76                          | [12]      |
|                                   |                 |    | (0.66; 0.51)        |                     |                      |                      | (0.28; 0.18)       | (0.18; 0.15)        | (0.73; 0.61)        |                     |                      | (2.03; 1.64) <sup>11</sup>         |           |
|                                   |                 |    | 95%                 |                     |                      |                      | 83%                | 100%                | 95%                 |                     |                      |                                    |           |
|                                   |                 |    | (>LOQ)              |                     |                      |                      | (>LOQ)             | (>LOQ)              | (>LOQ)              |                     |                      |                                    |           |
| Slovakia <sup>12</sup>            | 2006-2007       | 14 | (0.022; 0.017)      | (0.20; 0.12)        |                      |                      | (0.051; 0.032)     | (0.056; 0.043)      | (0.14; 0.12)        | (0.009; 0.008)      |                      | (0.52; 0.40) <sup>13</sup>         | [13]      |
|                                   |                 |    |                     |                     |                      |                      |                    |                     |                     |                     |                      |                                    |           |
| Belgium (Flanders)                | 2009-2010       | 84 | (-; <LOQ)           | (-; 0.16)           |                      |                      | (-; 0.06)          | (-; 0.06)           | (-; 0.29)           | (-; 0.07)           | (-; 0.65)            |                                    | [14]      |
| United Kingdom (Birmingham)       | 2010            | 35 |                     | 0.17-14.65          |                      | <0.05-0.83           | <0.06-3.43         | <0.05-1.86          | <0.06-4.57          | <0.06-11.1          | <0.06-0.92           |                                    | [15]      |
|                                   |                 |    |                     | (3.3; 2.8)          |                      | (0.08; 0.08)         | (0.71; 0.69)       | (0.45; 0.38)        | (1.1; 0.91)         | (0.30; 0.21)        | (0.31; 0.25)         |                                    |           |
|                                   |                 |    |                     | 100%                |                      | <0.05)               | 94%                | 89%                 | 97%                 | 77%                 | 69%                  |                                    |           |
| United Kingdom                    | 2011-2012       | 6  |                     |                     |                      |                      |                    |                     |                     |                     |                      |                                    |           |
|                                   |                 |    | 0.02-0.31 (-; 0.09) | 0.32-13.1 (-; 1.92) | <0.03-0.13 (-; 0.03) | <0.01-0.35 (-; 0.04) | 0.12-3.7 (-; 0.88) | 0.07-2.19 (-; 0.64) | 0.70-1.68 (-; 1.01) | 0.01-0.18 (-; 0.07) | <0.20-1.04 (-; 0.54) | 1.28-22.02 (-; 5.67) <sup>14</sup> | [16]      |
|                                   |                 |    | 100%                | 100%                | 67%                  | 83%                  | 100%               | 100%                | 100%                | 100%                | 83%                  |                                    |           |

| Country                           | Sampling period | n   | BDE-28                                | BDE-47                               | BDE-66                                 | BDE-85                       | BDE-99                               | BDE-100                           | BDE-153                            | BDE-154                             | BDE-209                             | Total PBDEs                            | Reference  |
|-----------------------------------|-----------------|-----|---------------------------------------|--------------------------------------|----------------------------------------|------------------------------|--------------------------------------|-----------------------------------|------------------------------------|-------------------------------------|-------------------------------------|----------------------------------------|------------|
| range (mean; median) [ng/g lipid] |                 |     |                                       |                                      |                                        |                              |                                      |                                   |                                    |                                     |                                     |                                        |            |
| detection rate                    |                 |     |                                       |                                      |                                        |                              |                                      |                                   |                                    |                                     |                                     |                                        |            |
| Germany                           | 2016            | 100 | <LOQ-0.12<br>(0.031;<br>0.029)        | x-2.4<br>(0.31;0.20)<br>100%         | <LOQ-<br>0.022<br>39%                  | <LOQ-<br>(;)<br>0.028<br>19% | <LOQ-0.42<br>(0.086;0.06<br>3)       | <LOQ-0.45<br>(0.076;0.05<br>4)    | x-1.98<br>(0.46;0.38)<br>100%      | <LOQ-<br>0.029<br>(0.009;0.00<br>7) | <LOQ-104<br>(4.22;0.42)<br>96%      | x-113<br>(5.73;1.74) <sup>1</sup><br>6 | [17]       |
| Austria (Vienna)                  | 2013            | 18  | n.d.-0.38<br>(0.11;<br><LOQ)<br>72.2% | n.d.-6.0<br>(1.04;<br><LOQ)<br>66.7% | n.d.-0.48<br>(0.051;<br>n.d.)<br>38.9% | n.d.<br>0%<br>66.7%          | n.d.-2.4<br>(0.52;<LO<br>Q)<br>66.7% | n.d.-1.1<br>(0.22; 0.16)<br>77.8% | n.d.-0.86<br>(0.28; 0.23)<br>88.9% | n.d.-1.3<br>(0.12; n.d.)<br>33.3%   | n.d.-43<br>(11.8;<br><LOQ)<br>55.6% | 0.055-52<br>(15; 11) <sup>15</sup>     | this study |

Abbreviations: LOQ: limit of quantification; n.d.: not detected.

<sup>1</sup> Σ BDE-47, -99, -100, -153 and -154. <sup>2</sup> Σ BDE-28, -47, -66, -71, -75, -77, -85, -99, -100, -119, -138, -153, -154 and -183. <sup>3</sup> Pooled sample consisting of 10 donors. <sup>4</sup> Σ BDE-17, -28, -47, -66, -85, -99, -100, -138, -153, -154 and -183. <sup>5</sup> Σ BDE-28, -47, -99, -100, -153, -154 and -209. <sup>6</sup> BDE-209 was investigated in a subsample (n=46). <sup>7</sup> Σ BDE-28, -47, -99, -100, -153, -154 and -183. <sup>8</sup> Σ BDE-17, -28, -47, -66, -85, -99, -100, -153 and -154. <sup>9</sup> Σ BDE-28, -47, -99, -100, -153 and -183. <sup>10</sup> Σ BDE-17, -28, -47, -66, -85, -99, -100, -153, -154, -183, -184, -191, -196, -197 and -209. <sup>11</sup> Σ BDE-47, -99, -100, -153 and -183. <sup>12</sup> Breast milk samples of women from four Slovakian areas were investigated in this study. Only the results from the area with the highest sample size are included in the table. <sup>13</sup> Σ BDE-28, -47, -99, -100, -153, -154 and -183. <sup>14</sup> Σ BDE-28, -47, -49, -66, -85, -99, -100, -138, -153, -154, -183 and -209. <sup>15</sup> Σ BDE-28, -47, -49, -66, -77, -85, -99, -100, -118, -126, -139, -153, -154, -181, -183, -196, -197, -203, -207 and -209. <sup>16</sup> Σ BDE-17, -18, -47, -66, -85, -99, -100, -153, -154, -183, -196, -197, -203, -206, -207, -208, -209.

**Table S4:** Results on PFOA and PFOS concentrations (ranges, means, medians; detection rates in %) from selected studies in European populations.

| Country (City)                        | Sampling period | n               | PFOS [ $\mu\text{g/l}$ ]            | PFOA [ $\mu\text{g/l}$ ]            | Reference |
|---------------------------------------|-----------------|-----------------|-------------------------------------|-------------------------------------|-----------|
| range (mean; median) detection rate % |                 |                 |                                     |                                     |           |
| Hungary (Gyor)                        | 1996-1997       | 13              | 0.096-0.639 (0.317; 0.330)          |                                     | [18]      |
| Germany (Leipzig)                     | 1996-2006       | 38              | 0.033-0.309 (0.126; 0.123)          |                                     | [18]      |
| Sweden (Uppsala)                      | 2004            | 12              | 0.060-0.470 (0.201; 0.166)          | <0.209-0.492 (0.017; -)             | [19]      |
|                                       |                 |                 | 100%                                | 92%                                 |           |
| Germany (Munich)                      | 2006            | 19              | 0.028-0.239 (0.116; 0.113)          |                                     | [18]      |
| Belgium                               | 2006            | 22              | <0.40-28.2 (-; 2.9)                 | <0.30-3.5 (-; 0.3)                  | [20]      |
| France                                | 2007            | 48              | <0.050-0.33 (0.092; 0.079)          | <0.070-0.224 (0.082; 0.075)         | [21]      |
|                                       |                 |                 | 90%                                 | 98%                                 |           |
| Spain (Catalonia)                     | 2007-2008       | 10              | 0.07-0.22 (0.12; 0.11)              | <LOD                                | [22]      |
|                                       |                 |                 | 100%                                | 0%                                  |           |
| Germany (Bavaria)                     | 2007-2008       | 302             | <0.02-0.26 (0.06; 0.05)             | <0.08-0.29 (0.08; -)                | [23]      |
|                                       |                 |                 | 100%                                | 2%                                  |           |
| Spain (Barcelona)                     | before 2010     | 20              | <0.012-0.865 (0.116; 0.084)         | <0.015-0.907 (0.15; -)              | [24]      |
|                                       |                 |                 | 95% (>LOQ)                          | 45%                                 |           |
| Belgium (Flanders)                    | 2009-2010       | 40              | (0.13; 0.10)                        | (0.08; 0.07)                        | [14]      |
|                                       |                 |                 | 100% (>LOQ)                         | 100% (>LOQ)                         |           |
| Italy (Bologna)                       | 2010            | 21 <sup>a</sup> | 0.015-0.288 (0.057; -) <sup>a</sup> | 0.024-0.241 (0.076; -) <sup>a</sup> | [25]      |
|                                       |                 |                 | 90% (>LOQ) <sup>a</sup>             | 81% (>LOQ) <sup>a</sup>             |           |
| Italy (Bologna)                       | 2010            | 16 <sup>b</sup> | 0.015-0.116 (0.036; -) <sup>b</sup> | 0.024-0.100 (0.043; -) <sup>b</sup> | [25]      |
|                                       |                 |                 | 63% (>LOQ) <sup>b</sup>             | 69% (>LOQ) <sup>b</sup>             |           |
| France (Toulouse)                     | 2010-2013       | 61              | <LOD-0.376 (0.04; <0.04)            | <LOD-0.308 (0.041; <0.05)           | [26]      |
|                                       |                 |                 | 82%                                 | 77%                                 |           |
| Italy (Siena)                         | before 2013     | 49              | 1.02-4.28 (0.85; -)                 | n.d.- 7.78 (0.16; -)                | [27]      |

| Country (City)                                                                                | Sampling period | n   | PFOS [ $\mu\text{g/l}$ ]   | PFOA [ $\mu\text{g/l}$ ] | Reference         |
|-----------------------------------------------------------------------------------------------|-----------------|-----|----------------------------|--------------------------|-------------------|
|                                                                                               |                 |     | range (mean; median)       | detection rate %         |                   |
|                                                                                               |                 |     | 41%                        | 2%                       |                   |
| Netherlands                                                                                   | 2014            | 50  | 0.045                      | <0.080                   | [28]              |
| Czech Republic                                                                                | 2014            | 164 | <0.002-0.095 (0.018; -)    | <0.006-0.159 (0.034; -)  | [29]              |
| Sweden                                                                                        | 2016            | 10  | 0.023-0.058 (0.039; -)     | <0.002-0.081 (0.042; -)  | [30]              |
|                                                                                               |                 |     | 25%                        | 25%                      |                   |
| Ireland                                                                                       | probably 2016   | 92  | <0.02-0.12 (0.038; 0.02)   | 0.016-0.35 (0.13; 0.10)  | [31]              |
|                                                                                               |                 |     | 62%                        | 100%                     |                   |
| Czech Republic                                                                                | 2017            | 232 | <0.002-0.083 (0.014; -)    | <0.003-0.16 (0.024; -)   | [29]              |
| Germany (Schleswig-Holstein)                                                                  | 2015-2017       | 80  | (0,018; <0,025)            | (0,016; <0,025)          | [17]              |
| Germany (Bavaria)                                                                             | 2016-2018       | 100 | (0,017; <0,025)            | (0,027; <0,025)          | [17]              |
| Austria (Vienna)                                                                              | 2013            | 21  | 0.058 – 0.31 (0.124; 0.11) | n.d.-0.83 (0.016; -)     | 52% present study |
|                                                                                               |                 |     | 100%                       |                          |                   |
| Austria (Vienna)                                                                              | 2014-2016       | 40  | <LOD-0.55 (0.015; 0.012)   | <LOQ-0.91 (0.030; 0.025) | present study     |
|                                                                                               |                 |     | 97.5%                      | 100%                     |                   |
| Abbreviations: LOQ: limit of quantification; LOD: limit of quantification; "-": not available |                 |     |                            |                          |                   |
| <sup>a</sup> primipara                                                                        |                 |     |                            |                          |                   |
| <sup>b</sup> multipara                                                                        |                 |     |                            |                          |                   |

**Table S5:** POPs detected in the Austrian pool sample within WHO/UNEP

| POP concentrations in WHO/UNEP pooled breast milk sample [ng/g lipid] (n=1)                                 |               | Health based values [ng/g lipid] | Daily intake via breast milk consumption [µg/kg bw/d] <sup>1</sup> |             | Health based guidance values <sup>2</sup> (TDI, PTDI, MRL <sup>3</sup> ) [µg/kg bw/d] |
|-------------------------------------------------------------------------------------------------------------|---------------|----------------------------------|--------------------------------------------------------------------|-------------|---------------------------------------------------------------------------------------|
| Substance                                                                                                   | Concentration |                                  | Average intake                                                     | High intake |                                                                                       |
| <b>Aldrin</b>                                                                                               | n.d.          | BE: 2,3002                       | -                                                                  | -           | TDI: 0.1 <sup>21</sup>                                                                |
| <b>Chlordane group</b><br>(sum of α-chlordane, γ-chlordane and oxy-chlordane; calculated as chlordane)      | 1.5           |                                  | 0.0081                                                             | 0.0121      | PTDI: 0.5 <sup>4</sup><br>MRL: 0.0000006 <sup>5</sup>                                 |
| <b>Dieldrin</b>                                                                                             | 2.0           | x                                | 0.0108                                                             | 0.0161      | PTDI, TDI: 0.1 <sup>6,21</sup><br>MRL: 0.00000005 <sup>5</sup>                        |
| <b>DDT group</b><br>(sum of o,p'-DDT, p,p'-DDT, p,p'-DDE and p,p'-DDD; calculated as DDT)                   | 120           | 2,300 <sup>18</sup>              | 0.6452                                                             | 0.9679      | PTDI: 0.00001 <sup>7</sup><br>MRL: 0.0000005 <sup>8</sup><br>TDI: 10 <sup>21</sup>    |
| <b>Endrin group</b><br>(sum of endrin and endrin ketone; calculated as endrin)                              | <0.5          |                                  | -                                                                  | -           |                                                                                       |
| <b>Heptachlor group</b><br>(sum of heptachlor and heptachlor-epoxide (cis/trans); calculated as heptachlor) | 1.6           |                                  | 0.0086                                                             | 0.0129      | TDI: 0.0000001 <sup>9</sup><br>MRL: 0.0000001 <sup>10</sup>                           |
| <b>HCB</b>                                                                                                  | 14.9          |                                  | 0.0807                                                             | 0.1210      | TDI: 0.17 <sup>11</sup><br>MRL: 0.00000007 <sup>5</sup>                               |
| <b>HCH-group</b>                                                                                            |               |                                  |                                                                    |             |                                                                                       |
| α-HCH                                                                                                       | <0.5          |                                  | -                                                                  | -           |                                                                                       |
| β-HCH                                                                                                       | 23.4          |                                  | 0.1258                                                             | 0.1887      | MRL: 0.0000006 <sup>12</sup>                                                          |
| γ-HCH                                                                                                       | <0.5          |                                  | -                                                                  | -           |                                                                                       |
| <b>Endosulfan group</b><br>(sum of alpha-endosulfan, beta-endosulfan, endosulfan sulfat)                    | <0.5          |                                  | -                                                                  | -           |                                                                                       |
| <b>Toxaphene group</b><br>(sum of parlar 26, parlar 50 and parlar 62)                                       | <0.5          |                                  | -                                                                  | -           |                                                                                       |
| <b>Mirex</b>                                                                                                | <0.5          |                                  | -                                                                  | -           |                                                                                       |
| <b>Hexabrombiphenyl</b>                                                                                     | <0.5          |                                  | -                                                                  | -           |                                                                                       |
| <b>Pentachlorobenzene</b>                                                                                   | <0.5          |                                  | -                                                                  | -           | TDI: 1 <sup>21</sup>                                                                  |
| <b>Pentachlorophenol</b>                                                                                    | <0.5          |                                  |                                                                    |             | TDI: 6 <sup>21</sup>                                                                  |
| <b>Pentachloroanisole</b>                                                                                   | <1.0          |                                  |                                                                    |             |                                                                                       |
| <b>Hexachlorobutadiene</b>                                                                                  | <1.0          |                                  |                                                                    |             |                                                                                       |
| <b>p,p-Dicofol</b>                                                                                          | NA            |                                  |                                                                    |             |                                                                                       |
| <b>Chlordecone</b>                                                                                          | <0.5          |                                  | -                                                                  | -           |                                                                                       |
| <b>HB CD group</b>                                                                                          | 6.0           |                                  |                                                                    |             |                                                                                       |
| α-HBCD                                                                                                      | 6.0           | BE: 190,000 <sup>13</sup>        | 0.0323                                                             | 0.0484      | -                                                                                     |

| POP concentrations in WHO/UNEP pooled breast milk sample [ng/g lipid] (n=1) |               | Health based values [ng/g lipid]  | Daily intake via breast milk consumption [µg/kg bw/d] <sup>1</sup> |             | Health based guidance values <sup>2</sup> (TDI, PTDI, MRL <sup>3</sup> ) [µg/kg bw/d] |
|-----------------------------------------------------------------------------|---------------|-----------------------------------|--------------------------------------------------------------------|-------------|---------------------------------------------------------------------------------------|
| Substance                                                                   | Concentration |                                   | Average intake                                                     | High intake |                                                                                       |
|                                                                             |               | HBM-I: 300 <sup>14,15</sup>       |                                                                    |             |                                                                                       |
| β-HBCD                                                                      | <0.1          |                                   | -                                                                  | -           |                                                                                       |
| γ-HBCD                                                                      | <0.1          |                                   | -                                                                  | -           |                                                                                       |
| <b>PBDEs (sum)<sup>16</sup></b>                                             | 1.32          |                                   |                                                                    |             |                                                                                       |
| BDE-17                                                                      | 0.0017        |                                   |                                                                    |             |                                                                                       |
| BDE-28                                                                      | 0.0256        |                                   |                                                                    |             |                                                                                       |
| BDE-47                                                                      | 0.412         |                                   |                                                                    |             |                                                                                       |
| BDE-66                                                                      | 0.0067        |                                   |                                                                    |             |                                                                                       |
| BDE-99                                                                      | 0.128         |                                   |                                                                    |             |                                                                                       |
| BDE-100                                                                     | 0.126         |                                   |                                                                    |             |                                                                                       |
| BDE-138                                                                     | 0.0042        |                                   |                                                                    |             |                                                                                       |
| BDE-153                                                                     | 0.548         |                                   |                                                                    |             |                                                                                       |
| BDE-154                                                                     | 0.0124        |                                   |                                                                    |             |                                                                                       |
| BDE-183                                                                     | 0.0542        |                                   |                                                                    |             |                                                                                       |
| <b>Dioxins and Furans (WHO2005-PCDD/F-TEQ)</b>                              | 0.0032        | BE (Dioxin-TEQ): 15 <sup>13</sup> |                                                                    |             | TWI: 2 pg TEQ/kg bw/week <sup>17</sup>                                                |
| 2,3,7,8-TCDF                                                                | 0.00028       |                                   |                                                                    |             |                                                                                       |
| 1,2,3,7,8-PeCDF                                                             | 0.00017       |                                   |                                                                    |             |                                                                                       |
| 2,3,4,7,8-PeCDF                                                             | 0.00354       |                                   |                                                                    |             |                                                                                       |
| 1,2,3,4,7,8-HxCDF                                                           | 0.00103       |                                   |                                                                    |             |                                                                                       |
| 1,2,3,6,7,8-HxCDF                                                           | 0.00092       |                                   |                                                                    |             |                                                                                       |
| 2,3,4,6,7,8-HxCDF                                                           | 0.00050       |                                   |                                                                    |             |                                                                                       |
| 1,2,3,7,8,9-HxCDF                                                           | 0.000039      |                                   |                                                                    |             |                                                                                       |
| 1,2,3,4,6,7,8-HpCDF                                                         | 0.00073       |                                   |                                                                    |             |                                                                                       |
| 1,2,3,4,7,8,9-HpCDF                                                         | 0.000037      |                                   |                                                                    |             |                                                                                       |
| OCDF                                                                        | 0.00010       |                                   |                                                                    |             |                                                                                       |
| 2,3,7,8-TCDD                                                                | 0.00044       |                                   |                                                                    |             |                                                                                       |
| 1,2,3,7,8-PeCDD                                                             | 0.00103       |                                   |                                                                    |             |                                                                                       |
| 1,2,3,4,7,8-HxCDD                                                           | 0.00054       |                                   |                                                                    |             |                                                                                       |
| 1,2,3,6,7,8-HxCDD                                                           | 0.00218       |                                   |                                                                    |             |                                                                                       |
| 1,2,3,7,8,9-HxCDD                                                           | 0.00065       |                                   |                                                                    |             |                                                                                       |
| 1,2,3,4,6,7,8-HpCDD                                                         | 0.0032        |                                   |                                                                    |             |                                                                                       |
| OCDD                                                                        | 0.0186        |                                   |                                                                    |             |                                                                                       |
| <b>Polychlorinated biphenyls (WHO-PCB-TEQ)</b>                              | 0.00231       |                                   |                                                                    |             | TWI: 2 pg TEQ/kg bw/week <sup>20</sup>                                                |
| PCB 28                                                                      | 0.91          |                                   |                                                                    |             |                                                                                       |
| PCB 52                                                                      | 0.11          |                                   |                                                                    |             |                                                                                       |
| PCB 101                                                                     | 0.18          |                                   |                                                                    |             |                                                                                       |
| PCB 138                                                                     | 9.6           |                                   |                                                                    |             |                                                                                       |
| PCB 153                                                                     | 17.7          |                                   |                                                                    |             |                                                                                       |
| PCB 180                                                                     | 9.6           |                                   |                                                                    |             |                                                                                       |
| sum of indicator PCB                                                        | 38.0          |                                   |                                                                    |             |                                                                                       |
| PCB 105                                                                     | 0.60          |                                   |                                                                    |             |                                                                                       |
| PCB 114                                                                     | 0.12          |                                   |                                                                    |             |                                                                                       |
| PCB 118                                                                     | 2.88          |                                   |                                                                    |             |                                                                                       |
| PCB 123                                                                     | 0.025         |                                   |                                                                    |             |                                                                                       |
| PCB 156                                                                     | 1.50          |                                   |                                                                    |             |                                                                                       |
| PCB 157                                                                     | 0.24          |                                   |                                                                    |             |                                                                                       |
| PCB 167                                                                     | 0.50          |                                   |                                                                    |             |                                                                                       |
| PCB 189                                                                     | 0.14          |                                   |                                                                    |             |                                                                                       |

| POP concentrations in WHO/UNEP pooled breast milk sample [ng/g lipid] (n=1) |               | Health based values [ng/g lipid] | Daily intake via breast milk consumption [µg/kg bw/d] <sup>1</sup> |             | Health based guidance values <sup>2</sup> (TDI, PTDI, MRL <sup>3</sup> ) [µg/kg bw/d] |
|-----------------------------------------------------------------------------|---------------|----------------------------------|--------------------------------------------------------------------|-------------|---------------------------------------------------------------------------------------|
| Substance                                                                   | Concentration |                                  | Average intake                                                     | High intake |                                                                                       |
| PCB 77                                                                      | 0.004         |                                  |                                                                    |             |                                                                                       |
| PCB 81                                                                      | 0.001         |                                  |                                                                    |             |                                                                                       |
| PCB 126                                                                     | 0.018         |                                  |                                                                    |             |                                                                                       |
| PCB 169                                                                     | 0.010         |                                  |                                                                    |             |                                                                                       |
| <b>WHO-mono-ortho PCB-TEQ</b>                                               | 0.00018       |                                  |                                                                    |             |                                                                                       |
| <b>WHO-non-ortho PCB-TEQ</b>                                                | 0.00213       |                                  |                                                                    |             |                                                                                       |
| <b>WHO-PCDD/F-PCB-TEQ</b>                                                   | 0.00551       |                                  |                                                                    |             |                                                                                       |
| <b>Chlorinated paraffins</b>                                                | 20            |                                  |                                                                    |             |                                                                                       |
| SCCPs                                                                       | 20            |                                  |                                                                    |             | TWI: 100 µg/kg bw/day <sup>19</sup>                                                   |
| MCCPs                                                                       | n.n.          |                                  |                                                                    |             |                                                                                       |

<sup>1</sup> Daily intakes were calculated based on results substance concentrations in the Austrian WHO pooled breast milk sample according to calculation procedure published in [32] considering the following assumptions: 800 ml breast milk consumption per day for average intake, 1,200 ml breast milk consumption per day for high intake, 6.1 kg infant bodyweight. Analytical data is expressed in ng/g lipid. The measured lipid content of the pooled breast milk sample is 4.1%, which was used for the calculation.

<sup>2</sup> Values are only given for substances found the investigated pooled breast milk sample. <sup>3</sup> [33]. <sup>4</sup> Derived based on liver toxicity in rats; source: [34]. <sup>5</sup> Chronic, oral; endpoint: hepatic. <sup>6</sup> [35]. <sup>7</sup> Derived based on developmental effects in rats; source: [36]. <sup>8</sup> MRL for p,p'-DDT; oral, intermediate; endpoint: hepatic. <sup>9</sup> Derived based on histopathological changes in liver of dogs; source: [37]. <sup>10</sup> Oral, intermediate; endpoint: immunotoxicity. <sup>11</sup> [36]. <sup>12</sup> Oral, intermediate; endpoint: hepatic. <sup>13</sup> [38]. <sup>14</sup> [39]. <sup>15</sup> HBM-I value for total HBCD. <sup>16</sup> sum of BDE-15, -17, -28, -47, -49, -66, -75, -77, -85, -99, -100, -119, -126, -138, -153, -154, -183, -190, -196, -197, -203, -206, -207, -208 and -209. <sup>17</sup> [40]. <sup>18</sup> [41]. <sup>19</sup> [42]. <sup>20</sup> [40]. <sup>21</sup> [43].

*Abbreviations:* BE: Biomonitoring Equivalent; bw: body weight; d: day; HBM: Human Biomonitoring; MRL: minimal risk level; n.d.: not detected; POP: persistent organic pollutants; PTDI: provisional tolerable daily intake; TDI: tolerable daily intake; TEQ: toxic equivalent; TWI: tolerable weekly intake.

## References

1. Lignell, S.; Aune, M.; Darnerud, P.O.; Cnattingius, S.; Glynn, A. Persistent organochlorine and organobromine compounds in mother's milk from Sweden 1996-2006: compound-specific temporal trends. *Environ. Res.* **2009**, *109*, 760–767, doi:10.1016/j.envres.2009.04.011.
2. Main, K.M.; Kiviranta, H.; Virtanen, H.E.; Sundqvist, E.; Tuomisto, J.T.; Tuomisto, J.; Vartiainen, T.; Skakkebaek, N.E.; Toppari, J. Flame retardants in placenta and breast milk and cryptorchidism in newborn boys. *Environ. Health Perspect.* **2007**, *115*, 1519–1526, doi:10.1289/ehp.9924.
3. Ingelido, A.M.; Ballard, T.; Dellatte, E.; Di Domenico, A.; Ferri, F.; Fulgenzi, A.R.; Herrmann, T.; Iacovella, N.; Miniero, R.; Päpke, O.; et al. Polychlorinated biphenyls (PCBs) and polybrominated diphenyl ethers (PBDEs) in milk from Italian women living in Rome and Venice. *Chemosphere* **2007**, *67*, 301-306, doi:10.1016/j.chemosphere.2006.05.111.
4. Polder, A.; Thomsen, C.; Lindström, G.; Løken, K.B.; Skaare, J.U. Levels and temporal trends of chlorinated pesticides, polychlorinated biphenyls and brominated flame retardants in individual human breast milk samples from Northern and Southern Norway. *Chemosphere* **2008**, *73*, 14–23, doi:10.1016/j.chemosphere.2008.06.002.
5. Kazda, R.; Hajšlová, J.; Poustka, J.; Čajka, T. Determination of polybrominated diphenyl ethers in human milk samples in the Czech Republic. *Anal. Chim. Acta* **2004**, *520*, 237–243, doi:10.1016/j.aca.2004.04.069.
6. Gómara, B.; Herrero, L.; Ramos, J.J.; Mateo, J.R.; Fernández, M.A.; García, J.F.; González, M.J. Distribution of polybrominated diphenyl ethers in human umbilical cord serum, paternal serum, maternal serum, placentas, and breast milk from Madrid population, Spain. *Environ. Sci. Technol.* **2007**, *41*, 6961–6968, doi:10.1021/es0714484.
7. Thomsen, C.; Stigum, H.; Frøshaug, M.; Broadwell, S.L.; Becher, G.; Eggesbø, M. Determinants of brominated flame retardants in breast milk from a large scale Norwegian study. *Environ. Int.* **2010**, *36*, 68–74, doi:10.1016/j.envint.2009.10.002.
8. Bordajandi, L.R.; Abad, E.; González, M.J. Occurrence of PCBs, PCDD/Fs, PBDEs and DDTs in Spanish breast milk: enantiomeric fraction of chiral PCBs. *Chemosphere* **2008**, *70*, 567–575, doi:10.1016/j.chemosphere.2007.07.019.
9. Jaraczewska, K.; Lulek, J.; Covaci, A.; Voorspoels, S.; Kaluba-Skotarczak, A.; Drews, K.; Schepens, P. Distribution of polychlorinated biphenyls, organochlorine pesticides and



- polybrominated diphenyl ethers in human umbilical cord serum, maternal serum and milk from Wielkopolska region, Poland. *Sci. Total Environ.* **2006**, *372*, 20–31, doi:10.1016/j.scitotenv.2006.03.030.
10. Antignac, J.-P.; Cariou, R.; Zalko, D.; Berrebi, A.; Cravedi, J.-P.; Maume, D.; Marchand, P.; Monteau, F.; Riu, A.; Andre, F.; et al. Exposure assessment of French women and their newborn to brominated flame retardants: determination of tri- to deca- polybromodiphenylethers (PBDE) in maternal adipose tissue, serum, breast milk and cord serum. *Environ. Pollut.* **2009**, *157*, 164–173, doi:10.1016/j.envpol.2008.07.008.
  11. Gómara, B.; Herrero, L.; Pacepavicius, G.; Ohta, S.; Alaei, M.; González, M.J. Occurrence of co-planar polybrominated/chlorinated biphenyls (PXBs), polybrominated diphenyl ethers (PBDEs) and polychlorinated biphenyls (PCBs) in breast milk of women from Spain. *Chemosphere* **2011**, *83*, 799–805, doi:10.1016/j.chemosphere.2011.02.080.
  12. Raab, U.; Preiss, U.; Albrecht, M.; Shahin, N.; Parlar, H.; Fromme, H. Concentrations of polybrominated diphenyl ethers, organochlorine compounds and nitro musks in mother's milk from Germany (Bavaria). *Chemosphere* **2008**, *72*, 87–94, doi:10.1016/j.chemosphere.2008.01.053.
  13. Chovancová, J.; Čonka, K.; Kočan, A.; Sejáková, Z.S. PCDD, PCDF, PCB and PBDE concentrations in breast milk of mothers residing in selected areas of Slovakia. *Chemosphere* **2011**, *83*, 1383–1390, doi:10.1016/j.chemosphere.2011.02.070.
  14. Croes, K.; Colles, A.; Koppen, G.; Govarts, E.; Bruckers, L.; van de Mieroop, E.; Nelen, V.; Covaci, A.; Dirtu, A.C.; Thomsen, C.; et al. Persistent organic pollutants (POPs) in human milk: a biomonitoring study in rural areas of Flanders (Belgium). *Chemosphere* **2012**, *89*, 988–994, doi:10.1016/j.chemosphere.2012.06.058.
  15. Abdallah, M.A.-E.; Harrad, S. Polybrominated diphenyl ethers in UK human milk: implications for infant exposure and relationship to external exposure. *Environ. Int.* **2014**, *63*, 130–136, doi:10.1016/j.envint.2013.11.009.
  16. Bramwell, L.; Fernandes, A.; Rose, M.; Harrad, S.; Pless-Mulloli, T. PBDEs and PBBs in human serum and breast milk from cohabiting UK couples. *Chemosphere* **2014**, *116*, 67–74, doi:10.1016/j.chemosphere.2014.03.060.
  17. Fromme, H.; Fuchs, V.; Albrecht, M.; Aschenbrenner, B.; Röhl, C.; Janitzki, N.; Herber-Jonat, S.; Wöckner, M.; Völkel, W.; Flemmer, A.W.; et al. Polychlorinated dioxins and dibenzofurans

- (PCDD/F), polybrominated dioxins and dibenzofurans (PBDD/F), polychlorinated biphenyls (PCB), polybrominated diphenyl ethers (PBDE), and per- and polyfluoroalkyl substances (PFAS) in German breast milk samples (LUPE 8). *Sci. Total Environ.* **2022**, *825*, 154066, doi:10.1016/j.scitotenv.2022.154066.
18. Völkel, W.; Genzel-Boroviczeny, O.; Demmelmair, H.; Gebauer, C.; Koletzko, B.; Twardella, D.; Raab, U.; Fromme, H. Perfluorooctane sulphonate (PFOS) and perfluorooctanoic acid (PFOA) in human breast milk: results of a pilot study. *International Journal of Hygiene and Environmental Health* **2008**, *211*, 440–446, doi:10.1016/j.ijheh.2007.07.024.
  19. Kärrman, A.; Ericson, I.; van Bavel, B.; Darnerud, P.O.; Aune, M.; Glynn, A.; Lignell, S.; Lindström, G. Exposure of perfluorinated chemicals through lactation: levels of matched human milk and serum and a temporal trend, 1996-2004, in Sweden. *Environ. Health Perspect.* **2007**, *115*, 226–230, doi:10.1289/ehp.9491.
  20. Roosens, L.; D'Hollander, W.; Bervoets, L.; Reynders, H.; van Campenhout, K.; Cornelis, C.; van den Heuvel, R.; Koppen, G.; Covaci, A. Brominated flame retardants and perfluorinated chemicals, two groups of persistent contaminants in Belgian human blood and milk. *Environ. Pollut.* **2010**, *158*, 2546–2552, doi:10.1016/j.envpol.2010.05.022.
  21. Antignac, J.-P.; Veyrand, B.; Kadar, H.; Marchand, P.; Oleko, A.; Le Bizec, B.; Vandentorren, S. Occurrence of perfluorinated alkylated substances in breast milk of French women and relation with socio-demographical and clinical parameters: results of the ELFE pilot study. *Chemosphere* **2013**, *91*, 802–808, doi:10.1016/j.chemosphere.2013.01.088.
  22. Kärrman, A.; Domingo, J.L.; Llebaria, X.; Nadal, M.; Bigas, E.; van Bavel, B.; Lindström, G. Biomonitoring perfluorinated compounds in Catalonia, Spain: concentrations and trends in human liver and milk samples. *Environ. Sci. Pollut. Res. Int.* **2010**, *17*, 750–758, doi:10.1007/s11356-009-0178-5.
  23. Raab, U.; Albrecht, M.; Preiss, U.; Völkel, W.; Schwegler, U.; Fromme, H. Organochlorine compounds, nitro musks and perfluorinated substances in breast milk - results from Bavarian Monitoring of Breast Milk 2007/8. *Chemosphere* **2013**, *93*, 461–467, doi:10.1016/j.chemosphere.2013.06.013.
  24. Llorca, M.; Farré, M.; Picó, Y.; Teijón, M.L.; Alvarez, J.G.; Barceló, D. Infant exposure of perfluorinated compounds: levels in breast milk and commercial baby food. *Environ. Int.* **2010**, *36*, 584–592, doi:10.1016/j.envint.2010.04.016.

25. Barbarossa, A.; Masetti, R.; Gazzotti, T.; Zama, D.; Astolfi, A.; Veyrand, B.; Pession, A.; Pagliuca, G. Perfluoroalkyl substances in human milk: a first survey in Italy. *Environ. Int.* **2013**, *51*, 27–30, doi:10.1016/j.envint.2012.10.001.
26. Cariou, R.; Veyrand, B.; Yamada, A.; Berrebi, A.; Zalko, D.; Durand, S.; Pollono, C.; Marchand, P.; Leblanc, J.-C.; Antignac, J.-P.; et al. Perfluoroalkyl acid (PFAA) levels and profiles in breast milk, maternal and cord serum of French women and their newborns. *Environ. Int.* **2015**, *84*, 71–81, doi:10.1016/j.envint.2015.07.014.
27. Guerranti, C.; Perra, G.; Corsolini, S.; Focardi, S.E. Pilot study on levels of perfluorooctane sulfonic acid (PFOS) and perfluorooctanoic acid (PFOA) in selected foodstuffs and human milk from Italy. *Food Chemistry* **2013**, *140*, 197–203, doi:10.1016/j.foodchem.2012.12.066.
28. Zeilmaker, M.J.; Moermond, C.; Brandon, E.; Hoogerhuis, P.; Razenberg, L.; Janssen, M. Persistent organic pollutants in human milk in the Netherlands. *National Institute for Public Health and the Environment* **2020**.
29. Černá, M.; Grafnetterová, A.P.; Dvořáková, D.; Pulkrabová, J.; Malý, M.; Janoš, T.; Vodrážková, N.; Tupá, Z.; Puklová, V. Biomonitoring of PFOA, PFOS and PFNA in human milk from Czech Republic, time trends and estimation of infant's daily intake. *Environ. Res.* **2020**, *188*, 109763, doi:10.1016/j.envres.2020.109763.
30. Awad, R.; Zhou, Y.; Nyberg, E.; Namazkar, S.; Yongning, W.; Xiao, Q.; Sun, Y.; Zhu, Z.; Bergman, Å.; Benskin, J.P. Emerging per- and polyfluoroalkyl substances (PFAS) in human milk from Sweden and China. *Environ. Sci.: Processes Impacts* **2020**, *22*, 2023–2030, doi:10.1039/D0EM00077A.
31. Abdallah, M.A.-E.; Wemken, N.; Drage, D.S.; Tlustos, C.; Cellarius, C.; Cleere, K.; Morrison, J.J.; Daly, S.; Coggins, M.A.; Harrad, S. Concentrations of perfluoroalkyl substances in human milk from Ireland: Implications for adult and nursing infant exposure. *Chemosphere* **2020**, *246*, 125724, doi:10.1016/j.chemosphere.2019.125724.
32. EFSA. European Food Safety Authority. Scientific Opinion on Polybrominated Diphenyl Ethers (PBDEs) in Food. *EFSA J.* **2011**, *9*, doi:10.2903/j.efsa.2011.2156.
33. ATSDR. Agency for Toxic Substances and Disease Registry. Minimal Risk Levels (MRLs) List. **2018**.

34. EFSA. European Food Safety Authority. Chlordane as undesirable substance in animal feed - Scientific Opinion of the Panel on Contaminants in the Food Chain. *EFSA J.* **2007**, 5, 582, doi:10.2903/j.efsa.2007.582.
35. EFSA. European Food Safety Authority. Opinion of the Scientific Panel on contaminants in the food chain [CONTAM] related to aldrin and dieldrin as undesirable substance in animal feed. *EFSA J.* **2005**, 3, 285, doi:10.2903/j.efsa.2005.285.
36. EFSA. European Food Safety Authority. Opinion of the Scientific Panel on contaminants in the food chain [CONTAM] related to DDT as an undesirable substance in animal feed. *EFSA J.* **2006**, 4, doi:10.2903/j.efsa.2006.433.
37. EFSA. European Food Safety Authority. Opinion of the Scientific Panel on contaminants in the food chain [CONTAM] related heptachlor as an undesirable substance in animal feed. *EFSA J.* **2007**, 5, doi:10.2903/j.efsa.2007.478.
38. WHO. World Health Organization. Human biomonitoring: facts and figures.: Copenhagen: WHO Regional Office for Europe **2015**.
39. UBA. Umweltbundesamt Deutschland. FACTSHEET HBM value for HBCD **2015**.
40. EFSA. European Food Safety Authority. Risk for animal and human health related to the presence of dioxins and dioxin-like PCBs in feed and food. *EFSA J.* **2018**, 16, e05333, doi:10.2903/j.efsa.2018.5333.
41. WHO. World Health Organization. Pesticide residues in food - 2000: Toxicological evaluations **2001**.
42. Schrenk, D.; Bignami, M.; Bodin, L.; Chipman, J.K.; Del Mazo, J.; Grasl-Kraupp, B.; Hogstrand, C.; Hoogenboom, L.R.; Leblanc, J.-C.; Nebbia, C.S.; et al. Risk assessment of chlorinated paraffins in feed and food. *EFSA J.* **2020**, 18, e05991, doi:10.2903/j.efsa.2020.5991.
43. Health Canada. Non-Carcinogen Tolerable Daily Intake (TDI) Values from Health Canada **2007**.
